# Supplementary material for: Syntheses, structural characterisation and electronic structures of ferrocenyl-osmafuran heterobinuclear organometallic complexes
Source: Royal Society of Chemistry journal article supplement (doi:10.1039/c7dt03145a), 2017-01-01
Supplement: c7dt03145a1.pdf [file c7dt03145a1.pdf]

# Syntheses, Structural Characterisation and Electronic Structures of Ferrocenyl-Osmafuran Heterobinuclear Organometallic Complexes

Bin Liu,<sup>\*,†,‡</sup> Chun-Lan Guo,<sup>†</sup> Wen-Xia Liu,<sup>†</sup> Ming-E Guo,<sup>†</sup> Feng Yan,<sup>†</sup> Lu-Sha Xue,<sup>†</sup> Huijuan Wang,<sup>§</sup> Chang-Lin Liu,<sup>†</sup> Shan Jin,<sup>\*,†</sup>

<sup>†</sup>*Key Laboratory of Pesticide and Chemical Biology, Ministry of Education, College of Chemistry, Central China Normal University, Wuhan 430079, P.R. China.*

<sup>‡</sup>*College of Chemistry & Chemical Engineering, Hubei University, Wuhan, 430062, P.R. China.*

<sup>§</sup>*Wuhan Institute of Physics and Mathematics, Chinese Academy of Sciences, Wuhan 430079, P.R. China.*

## 1. Crystallographic Information

Table S1. Crystal Data, Date Collection, and Refinement Parameters for **1**, **3**, and **4**.

| Complex           | <b>1</b>                                                            | <b>3</b>                                                                                          | <b>4</b>                                                               |
|-------------------|---------------------------------------------------------------------|---------------------------------------------------------------------------------------------------|------------------------------------------------------------------------|
| Empirical formula | C <sub>73</sub> H <sub>68</sub> Cl <sub>6</sub> FeOOSp <sub>3</sub> | C <sub>71</sub> H <sub>59</sub> Cl <sub>4</sub> FeN <sub>2</sub> OOSp <sub>3</sub> S <sub>2</sub> | C <sub>61.50</sub> H <sub>58</sub> Cl <sub>7</sub> FeOOSp <sub>3</sub> |
| Formula weight    | 1512.93                                                             | 1501.08                                                                                           | 1400.19                                                                |
| <i>T</i> (K)      | 100(2)                                                              | 100(2)                                                                                            | 100(2)                                                                 |
| Wavelength (Å)    | 0.71073                                                             | 0.71073                                                                                           | 0.71073                                                                |
| Crystal System    | Monoclinic                                                          | Triclinic                                                                                         | Monoclinic                                                             |
| Space group       | <i>P2<sub>1</sub>/n</i>                                             | <i>P-1</i>                                                                                        | <i>P2<sub>1</sub>/n</i>                                                |
| <i>a</i> (Å)      | 14.7133(10)                                                         | 11.3898(19)                                                                                       | 12.8226(8)                                                             |
| <i>b</i> (Å)      | 20.3718(13)                                                         | 13.782(2)                                                                                         | 21.1839(14)                                                            |
| <i>c</i> (Å)      | 23.0817(15)                                                         | 22.283(4)                                                                                         | 22.4869(15)                                                            |
| <i>α</i> (°)      | 90                                                                  | 95.356(2)                                                                                         | 90                                                                     |

|                                          |           |            |              |
|------------------------------------------|-----------|------------|--------------|
| $\beta$ (°)                              | 103.2620  | 97.768(2)  | 103.8090(10) |
| $\gamma$ (°)                             | 90        | 111.383(2) | 90           |
| $V$ (Å <sup>3</sup> )                    | 6733.9(8) | 3188.5(9)  | 5931.6(7)    |
| $Z$                                      | 4         | 2          | 4            |
| $F(000)$                                 | 3052      | 1508       | 2804         |
| $D_{\text{calcd}}$ (Mg m <sup>-3</sup> ) | 1.492     | 1.564      | 1.568        |
| $\mu$ (mm <sup>-1</sup> )                | 2.453     | 2.573      | 2.822        |
| Reflection collected                     | 11780     | 21708      | 62638        |
| Unique Reflection                        | 11780     | 11043      | 18739        |
| $R_{\text{int}}$                         | 0.0000    | 0.0359     | 0.0305       |
| GOF                                      | 1.089     | 1.062      | 1.039        |
| $R_1$ ( $I > 2\sigma(I)$ )               | 0.0378    | 0.0608     | 0.0374       |
| $wR_2$ (all data)                        | 0.1132    | 0.1805     | 0.1119       |

Table S2. Summary of important bond lengths (Å) and angles (°) from the crystallographically determined **1**.

| Bond Lengths (Å) |            |          |            |           |          |
|------------------|------------|----------|------------|-----------|----------|
| Os1-P1           | 2.2968(12) | Os1-Cl2  | 2.4222(12) | C3-O1     | 1.273(6) |
| Os1-P2           | 2.3318(12) | Os1-C1   | 1.913(5)   | C2-P3     | 1.766(5) |
| Os1-O1           | 2.128(3)   | C1-C2    | 1.434(7)   | C3-C4     | 1.471(7) |
| Os1-Cl1          | 2.5359(12) | C2-C3    | 1.430(7)   |           |          |
| Bond Angles (°)  |            |          |            |           |          |
| C1-Os1-O1        | 78.03(17)  | C1-C2-C3 | 112.5(4)   | C3-O1-Os1 | 114.7(3) |
| Os1-C1-C2        | 117.6(4)   | C2-C3-O1 | 116.3(4)   |           |          |

Table S3. Summary of important bond lengths (Å) and angles (°) from the crystallographically determined **3**.

| Bond Lengths (Å) |            |          |          |           |          |
|------------------|------------|----------|----------|-----------|----------|
| Os1-P1           | 2.3547(14) | Os1-N2   | 2.138(5) | C3-O1     | 1.281(7) |
| Os1-P2           | 2.2773(14) | Os1-C1   | 1.951(5) | C2-P3     | 1.778(6) |
| Os1-O1           | 2.142(4)   | C1-C2    | 1.406(8) | C3-C4     | 1.468(8) |
| Os1-N1           | 2.075(4)   | C2-C3    | 1.436(8) |           |          |
| Bond Angles (°)  |            |          |          |           |          |
| C1-Os1-O1        | 77.80(19)  | C1-C2-C3 | 113.6(5) | C3-O1-Os1 | 114.4(3) |
| Os1-C1-C2        | 117.4(4)   | C2-C3-O1 | 116.4(5) |           |          |

Table S4. Summary of important bond lengths (Å) and angles (°) from the crystallographically determined 4.

| Bond Lengths (Å) |           |          |           |           |          |
|------------------|-----------|----------|-----------|-----------|----------|
| Os1-P1           | 2.2890(9) | Os1-Cl2  | 2.4550(8) | C3-O1     | 1.266(4) |
| Os1-P2           | 2.2534(8) | Os1-C1   | 1.935(3)  | C2-P3     | 1.757(3) |
| Os1-O1           | 2.124(2)  | C1-C2    | 1.421(4)  | C3-C4     | 1.474(5) |
| Os1-Cl1          | 2.5149(8) | C2-C3    | 1.435(4)  |           |          |
| Bond Angles (°)  |           |          |           |           |          |
| C1-Os1-O1        | 78.78(11) | C1-C2-C3 | 113.3(3)  | C3-O1-Os1 | 113.7(2) |
| Os1-C1-C2        | 116.2(2)  | C2-C3-O1 | 117.0(3)  |           |          |

## 2. Electrochemical data

Table S5. Electrochemical data for compounds **1** - **4** (1 mM in CH<sub>2</sub>Cl<sub>2</sub>) at 25 °C in various supporting electrolyte systems.

| Complex  | <sup>n</sup> -Bu <sub>4</sub> NPF <sub>6</sub> (0.1 M) |                                        |                | <sup>n</sup> -Bu <sub>4</sub> N[B(C <sub>6</sub> F <sub>5</sub> ) <sub>4</sub> ] (0.05 M) |                                        |                |
|----------|--------------------------------------------------------|----------------------------------------|----------------|-------------------------------------------------------------------------------------------|----------------------------------------|----------------|
|          | <i>E</i> <sub>p</sub> <sup>1</sup> (V)                 | <i>E</i> <sub>p</sub> <sup>2</sup> (V) | Δ <i>E</i> (V) | <i>E</i> <sub>p</sub> <sup>1</sup> (V)                                                    | <i>E</i> <sub>p</sub> <sup>2</sup> (V) | Δ <i>E</i> (V) |
| <b>1</b> | 0.052                                                  | 0.470                                  | 0.420          | 0.041                                                                                     | 0.550                                  | 0.510          |
| <b>2</b> | -0.004                                                 | 0.516                                  | 0.520          | -0.025                                                                                    | 0.612                                  | 0.640          |
| <b>3</b> | 0.232                                                  | 0.560                                  | 0.328          | 0.249                                                                                     | 0.621                                  | 0.372          |
| <b>4</b> | 0.016                                                  | 0.458                                  | 0.442          | -0.004                                                                                    | 0.523                                  | 0.530          |
| <b>5</b> | 0.172                                                  | 0.724                                  |                | 0.143                                                                                     | 0.704                                  |                |
| Fc       | 0.204                                                  |                                        |                | 0.224                                                                                     |                                        |                |

<sup>a</sup> Peak potentials (*E*<sub>p</sub><sup>1</sup> and *E*<sub>p</sub><sup>2</sup>) from square-wave voltammetry in 0.1 M CH<sub>2</sub>Cl<sub>2</sub> at 10 Hz for SWV. Potentials *E*<sub>p</sub> are in V vs Ag<sup>+</sup>/Ag.

<sup>b</sup> Peak potential differences Δ*E* = *E*<sub>p</sub><sup>2</sup> - *E*<sub>p</sub><sup>1</sup> are in V.

### 3. Molecular geometries

Table S6. Selected Bond Lengths(Å), Bond Angles(deg), and Dihedral Angles(deg)

from the DFT-Optimized Structures [1]<sup>n+</sup> (n = 0, 1, 2) and crystal structure **1**.

|                             | <b>1</b>    | <b>[1]</b> | <b>[1]<sup>1+</sup></b> | <b>[1]<sup>2+</sup></b> |
|-----------------------------|-------------|------------|-------------------------|-------------------------|
| <b>Bond Lengths (Å)</b>     |             |            |                         |                         |
| Os1-P1                      | 2.2968 (12) | 2.43035    | 2.46117                 | 2.50559                 |
| Os1-P2                      | 2.3318 (12) | 2.41788    | 2.49008                 | 2.53164                 |
| Os1-C11                     | 2.5359 (12) | 2.59029    | 2.46749                 | 2.41439                 |
| Os1-C12                     | 2.4222 (12) | 2.50882    | 2.49647                 | 2.46215                 |
| Os1-C1                      | 1.913 (5)   | 1.93523    | 1.97192                 | 2.00416                 |
| Os1-O1                      | 2.128 (3)   | 2.11157    | 2.07942                 | 2.02115                 |
| C1-C2                       | 1.434 (7)   | 1.43296    | 1.40085                 | 1.38252                 |
| C2-C3                       | 1.430 (7)   | 1.41797    | 1.43082                 | 1.42893                 |
| C3- O1                      | 1.273 (6)   | 1.30947    | 1.31406                 | 1.33953                 |
| <b>Bond Angles (deg)</b>    |             |            |                         |                         |
| P1- Os1-P2                  | 99.77 (4)   | 99.65760   | 102.25541               | 91.55710                |
| C11- Os1- C12               | 84.21 (4)   | 87.08612   | 85.35250                | 82.53594                |
| C1- Os1- O1                 | 78.03 (17)  | 79.15768   | 77.04608                | 74.70604                |
| Os1-C1- C2                  | 117.6 (4)   | 114.81017  | 116.81790               | 118.47487               |
| C1- C2- C3                  | 112.5 (4)   | 114.89582  | 113.91130               | 112.67826               |
| C2- C3- O1                  | 116.3 (4)   | 115.22711  | 113.53295               | 110.97826               |
| C3- O1- Os1                 | 114.7 (3)   | 113.54355  | 116.68610               | 120.36923               |
| <b>Torsion Angles (deg)</b> |             |            |                         |                         |
| Os1-C1-C2-C3                | -8.01       | -11.10094  | -9.37700                | -10.25596               |
| Os1-O1-C3-C2                | 5.97        | 11.32430   | 11.45623                | 14.51708                |
| C2-C3-C4-C5                 | -23.99      | -52.00509  | -38.90370               | -26.49110               |
| O1-C3-C4-C5                 | 162.30      | 132.01880  | 145.37038               | 158.00000               |

Table S7. Selected Bond Lengths(Å), Bond Angles(deg), and Dihedral Angles(deg)

from the DFT-Optimized Structures [2]<sup>n+</sup> (n = 0, 1, 2)

|                             | [2]       | [2] <sup>1+</sup> | [2] <sup>2+</sup> |
|-----------------------------|-----------|-------------------|-------------------|
| <b>Bond Lengths (Å)</b>     |           |                   |                   |
| Os1-P1                      | 2.41919   | 2.45625           | 2.48470           |
| Os1-P2                      | 2.37777   | 2.46375           | 2.50160           |
| Os1-O1                      | 2.19015   | 2.06760           | 1.94008           |
| Os1-O3                      | 2.09146   | 2.10551           | 2.15261           |
| Os1-C2                      | 1.93450   | 1.96449           | 1.97309           |
| Os1-O4                      | 2.10339   | 2.08079           | 2.13427           |
| O1-C1                       | 1.36585   | 1.41032           | 1.46817           |
| C1- O2                      | 1.23002   | 1.21594           | 1.20476           |
| C1- O3                      | 1.39963   | 1.38229           | 1.34945           |
| C2-C3                       | 1.43367   | 1.40004           | 1.36180           |
| C3-C4                       | 1.42640   | 1.43653           | 1.46081           |
| C4- O4                      | 1.31237   | 1.31655           | 1.31273           |
| <b>Bond Angles (deg)</b>    |           |                   |                   |
| P1- Os1-P2                  | 98.71545  | 100.45718         | 103.14932         |
| O1- Os1- O3                 | 63.17645  | 64.84098          | 65.01666          |
| C2- Os1- O4                 | 79.94309  | 77.42606          | 73.90066          |
| Os1-C2- C3                  | 112.51144 | 115.49602         | 120.63194         |
| C2- C3- C4                  | 115.15529 | 113.82482         | 111.83144         |
| C3- C4- O4                  | 115.21190 | 113.65632         | 112.57449         |
| C4- O4- Os1                 | 111.79419 | 114.81994         | 116.17544         |
| Os1-O1- C1                  | 91.61495  | 94.32709          | 98.68463          |
| O1-C1- O3                   | 108.48944 | 106.49308         | 103.03084         |
| C1- O3- Os1                 | 94.87695  | 93.54699          | 93.20571          |
| <b>Torsion Angles (deg)</b> |           |                   |                   |
| Os1-O1-C1-O3                | -12.09744 | -8.08461          | -2.32944          |
| Os1-C2-C3-C4                | -17.69374 | -15.35031         | -15.29674         |
| Os1-O4-C4-C3                | 15.67985  | 16.55650          | 17.55425          |
| C3-C4-C5-C6                 | -27.75776 | -23.88684         | -19.62320         |

O4-C4-C5-C6

157.80104

160.04752

165.50034

Table S8. Selected Bond Lengths(Å), Bond Angles(deg), and Dihedral Angles(deg) from the DFT-Optimized Structures [3]<sup>n+</sup> (n = 0, 1, 2) and crystal structure **3**.

|                             | <b>3</b>    | <b>[3]</b> | <b>[3]<sup>1+</sup></b> | <b>[3]<sup>2+</sup></b> |
|-----------------------------|-------------|------------|-------------------------|-------------------------|
| <b>Bond Lengths (Å)</b>     |             |            |                         |                         |
| Os1-P1                      | 2.3547 (14) | 2.46079    | 2.48454                 | 2.49516                 |
| Os1-P2                      | 2.2773 (14) | 2.40328    | 2.47419                 | 2.48489                 |
| Os1-N1                      | 2.075 (4)   | 2.04123    | 2.03908                 | 2.02844                 |
| Os1-N2                      | 2.138 (5)   | 2.11373    | 2.02883                 | 1.98692                 |
| Os1-C1                      | 1.951 (5)   | 1.96017    | 1.99329                 | 2.03375                 |
| Os1-O1                      | 2.142 (4)   | 2.12240    | 2.09488                 | 2.05243                 |
| C1-C2                       | 1.406 (8)   | 1.42697    | 1.40011                 | 1.39193                 |
| C2-C3                       | 1.436 (8)   | 1.42785    | 1.43937                 | 1.45158                 |
| C3- O1                      | 1.281 (7)   | 1.30615    | 1.30968                 | 1.29027                 |
| C3-C4                       | 1.468 (8)   | 1.46112    | 1.44689                 | 1.44516                 |
| <b>Bond Angles (deg)</b>    |             |            |                         |                         |
| P1- Os1-P2                  | 98.81 (5)   | 99.54920   | 102.32179               | 100.59517               |
| N1- Os1- N2                 | 86.05 (18)  | 85.74083   | 85.43869                | 83.08441                |
| C1- Os1- O1                 | 77.80 (19)  | 78.96400   | 77.41331                | 74.53457                |
| Os1-C1- C2                  | 117.4 (4)   | 114.79358  | 115.75121               | 117.96591               |
| C1- C2- C3                  | 113.6 (5)   | 114.94655  | 114.22037               | 111.50931               |
| C2- C3- O1                  | 116.4 (5)   | 115.68500  | 114.43528               | 113.19667               |
| C3- O1- Os1                 | 114.4 (3)   | 113.53976  | 115.48720               | 120.09364               |
| <b>Torsion Angles (deg)</b> |             |            |                         |                         |
| Os1-C1-C2-C3                | -6.86       | -9.29802   | -10.01474               | -8.40364                |
| Os1-O1-C3-C2                | 1.47        | 11.60915   | 13.88008                | 15.61637                |
| C2-C3-C4-C5                 | -24.75      | -49.11874  | -44.46051               | -32.10078               |
| O1-C3-C4-C5                 | 161.43      | 135.33900  | 141.01277               | 153.20716               |

Table S9. Selected Bond Lengths(Å), Bond Angles(deg), and Dihedral Angles(deg)

from the DFT-Optimized Structures [4]<sup>n+</sup> (n = 0, 1, 2) and crystal structure 4.

|                             | 4          | [4]        | [4] <sup>1+</sup> | [4] <sup>2+</sup> |
|-----------------------------|------------|------------|-------------------|-------------------|
| <b>Bond Lengths (Å)</b>     |            |            |                   |                   |
| Os1-P1                      | 2.2890 (9) | 2.39266    | 2.42344           | 2.49874           |
| Os1-P2                      | 2.2534 (8) | 2.36893    | 2.45731           | 2.49287           |
| Os1-Cl1                     | 2.5149 (8) | 2.53877    | 2.52425           | 2.47441           |
| Os1-Cl2                     | 2.4550 (8) | 2.60475    | 2.47818           | 2.42060           |
| Os1-C1                      | 1.935 (3)  | 1.94429    | 1.98233           | 2.03123           |
| Os1-O1                      | 2.124 (2)  | 2.10425    | 2.07180           | 1.96003           |
| C1-C2                       | 1.421 (4)  | 1.43022    | 1.39495           | 1.39335           |
| C2-C3                       | 1.435 (4)  | 1.42615    | 1.44068           | 1.42985           |
| C3- O1                      | 1.266 (4)  | 1.30164    | 1.30609           | 1.35471           |
| C3-C4                       | 1.474 (5)  | 1.46316    | 1.44435           | 1.41726           |
| <b>Bond Angles (deg)</b>    |            |            |                   |                   |
| P1- Os1-P2                  | 93.53 (3)  | 94.12885   | 94.55050          | 89.43685          |
| Cl1- Os1- Cl2               | 85.94 (3)  | 89.27048   | 88.84168          | 85.37883          |
| C1- Os1- O1                 | 78.78 (11) | 79.15267   | 76.70400          | 75.80154          |
| Os1-C1- C2                  | 116.2 (2)  | 115.21203  | 117.39023         | 116.22909         |
| C1- C2- C3                  | 113.3 (3)  | 114.72880  | 113.60480         | 112.69483         |
| C2- C3- O1                  | 117.0 (3)  | 115.20082  | 113.19164         | 110.80572         |
| C3- O1- Os1                 | 113.7 (2)  | 114.47376  | 117.83578         | 120.65606         |
| <b>Torsion Angles (deg)</b> |            |            |                   |                   |
| Os1-C1-C2-C3                | 3.79       | 6.05316    | 4.66247           | 8.31706           |
| Os1-O1-C3-C2                | -9.97      | -9.82997   | -11.14620         | -19.40070         |
| C2-C3-C4-C5                 | -134.89    | -142.71514 | -153.88473        | -165.50079        |
| O1-C3-C4-C5                 | 40.35      | 34.07838   | 23.19668          | 12.38937          |



Table S10. Energy and composition of frontier molecular orbitals in the complex **1**

| MO  |      | eV    | Cl1 | (PPh <sub>3</sub> )1 | Os | (PPh <sub>3</sub> )2 | Cl2 | C=C-C=O | (PPh <sub>3</sub> )3 | C <sub>3</sub> H <sub>4</sub> | Fe | C <sub>3</sub> H <sub>5</sub> |
|-----|------|-------|-----|----------------------|----|----------------------|-----|---------|----------------------|-------------------------------|----|-------------------------------|
| 292 | L+3  | -1.08 | 0   | 0                    | 1  | 0                    | 0   | 3       | 96                   | 0                             | 0  | 0                             |
| 291 | L+2  | -1.23 | 1   | 0                    | 15 | 1                    | 1   | 37      | 33                   | 4                             | 6  | 2                             |
| 290 | L+1  | -1.36 | 0   | 0                    | 0  | 0                    | 0   | 3       | 97                   | 0                             | 0  | 0                             |
| 289 | LUMO | -1.53 | 0   | 0                    | 2  | 0                    | 0   | 7       | 90                   | 0                             | 1  | 0                             |
| 288 | HOMO | -4.24 | 23  | 6                    | 64 | 0                    | 1   | 6       | 0                    | 0                             | 0  | 0                             |
| 287 | H-1  | -4.52 | 10  | 4                    | 56 | 2                    | 15  | 11      | 2                    | 0                             | 0  | 0                             |
| 286 | H-2  | -4.79 | 17  | 0                    | 33 | 2                    | 12  | 13      | 0                    | 4                             | 17 | 2                             |
| 285 | H-3  | -5.03 | 0   | 0                    | 0  | 0                    | 0   | 0       | 0                    | 7                             | 88 | 5                             |

Table S11. Energy and composition of frontier molecular orbitals in the complex **1<sup>+</sup>**

| MO           |                  | eV    | Cl1 | (PPh <sub>3</sub> )1 | Os | (PPh <sub>3</sub> )2 | Cl2 | C=C-C=O | (PPh <sub>3</sub> )3 | C <sub>3</sub> H <sub>4</sub> | Fe | C <sub>3</sub> H <sub>5</sub> |
|--------------|------------------|-------|-----|----------------------|----|----------------------|-----|---------|----------------------|-------------------------------|----|-------------------------------|
| 292 $\alpha$ | $\alpha$ -LUSO+3 | -3.34 | 0   | 14                   | 32 | 20                   | 7   | 6       | 21                   | 0                             | 0  | 0                             |
| 1122 $\beta$ | $\beta$ -LUSO+3  | -3.60 | 0   | 0                    | 0  | 0                    | 0   | 4       | 96                   | 0                             | 0  | 0                             |
| 291 $\alpha$ | $\alpha$ -LUSO+2 | -3.60 | 0   | 0                    | 0  | 0                    | 0   | 3       | 97                   | 0                             | 0  | 0                             |
| 1121 $\beta$ | $\beta$ -LUSO+2  | -3.70 | 0   | 0                    | 1  | 0                    | 0   | 3       | 95                   | 0                             | 1  | 0                             |
| 290 $\alpha$ | $\alpha$ -LUSO+1 | -3.70 | 0   | 0                    | 1  | 0                    | 0   | 3       | 95                   | 0                             | 1  | 0                             |
| 1120 $\beta$ | $\beta$ -LUSO+1  | -4.34 | 1   | 0                    | 17 | 1                    | 2   | 60      | 3                    | 6                             | 7  | 3                             |
| 289 $\alpha$ | $\alpha$ -LUSO   | -4.37 | 1   | 0                    | 13 | 1                    | 2   | 64      | 2                    | 7                             | 7  | 3                             |
| 1119 $\beta$ | $\beta$ -LUSO    | -5.58 | 15  | 5                    | 72 | 0                    | 1   | 7       | 0                    | 0                             | 0  | 0                             |
| 288 $\alpha$ | $\alpha$ -HOSO   | -7.48 | 0   | 0                    | 2  | 0                    | 0   | 2       | 0                    | 7                             | 83 | 6                             |
| 1118 $\beta$ | $\beta$ -HOSO    | -7.49 | 1   | 0                    | 4  | 0                    | 1   | 2       | 0                    | 7                             | 81 | 4                             |
| 287 $\alpha$ | $\alpha$ -HOSO-1 | -7.54 | 0   | 0                    | 0  | 0                    | 0   | 0       | 0                    | 6                             | 88 | 6                             |
| 1117 $\beta$ | $\beta$ -HOSO-1  | -7.55 | 0   | 0                    | 0  | 0                    | 0   | 0       | 0                    | 6                             | 88 | 6                             |
| 286 $\alpha$ | $\alpha$ -HOSO-2 | -8.02 | 9   | 2                    | 44 | 2                    | 32  | 9       | 1                    | 0                             | 1  | 0                             |
| 1116 $\beta$ | $\beta$ -HOSO-2  | -7.78 | 9   | 5                    | 49 | 2                    | 24  | 10      | 1                    | 0                             | 0  | 0                             |
| 285 $\alpha$ | $\alpha$ -HOSO-3 | -8.11 | 21  | 6                    | 29 | 4                    | 17  | 7       | 0                    | 7                             | 2  | 7                             |
| 1115 $\beta$ | $\beta$ -HOSO-3  | -7.96 | 16  | 0                    | 33 | 3                    | 16  | 11      | 0                    | 8                             | 6  | 7                             |

Table S12. Energy and composition of frontier molecular orbitals in the complex **2**

| MO  |      | eV    | (PPh <sub>3</sub> )1 | Os | (PPh <sub>3</sub> )2 | η <sup>2</sup> -CO <sub>3</sub> | C=C-C=O | (PPh <sub>3</sub> )3 | C <sub>3</sub> H <sub>4</sub> | Fe | C <sub>3</sub> H <sub>5</sub> |
|-----|------|-------|----------------------|----|----------------------|---------------------------------|---------|----------------------|-------------------------------|----|-------------------------------|
| 290 | L+3  | -0.98 | 0                    | 1  | 0                    | 0                               | 3       | 95                   | 0                             | 1  | 0                             |
| 289 | L+2  | -1.09 | 0                    | 8  | 3                    | 1                               | 25      | 53                   | 3                             | 6  | 1                             |
| 288 | L+1  | -1.21 | 0                    | 4  | 1                    | 0                               | 16      | 72                   | 2                             | 4  | 1                             |
| 287 | LUMO | -1.42 | 0                    | 2  | 0                    | 0                               | 5       | 90                   | 1                             | 1  | 1                             |
| 286 | HOMO | -4.10 | 5                    | 67 | 2                    | 18                              | 8       | 0                    | 0                             | 0  | 0                             |
| 285 | H-1  | -4.44 | 6                    | 63 | 4                    | 20                              | 5       | 0                    | 1                             | 1  | 0                             |
| 284 | H-2  | -4.76 | 0                    | 36 | 4                    | 10                              | 22      | 3                    | 3                             | 21 | 1                             |
| 283 | H-3  | -5.02 | 0                    | 0  | 0                    | 0                               | 0       | 0                    | 6                             | 87 | 7                             |

Table S13. Energy and composition of frontier molecular orbitals in the complex **2<sup>+</sup>**

| MO                |          | eV    | (PPh <sub>3</sub> )1 | Os | (PPh <sub>3</sub> )2 | η <sup>2</sup> -CO <sub>3</sub> | C=C-C=O | (PPh <sub>3</sub> )3 | C <sub>3</sub> H <sub>4</sub> | Fe | C <sub>3</sub> H <sub>5</sub> |
|-------------------|----------|-------|----------------------|----|----------------------|---------------------------------|---------|----------------------|-------------------------------|----|-------------------------------|
| 290 <sub>α</sub>  | α-LUSO+3 | -3.23 | 0                    | 1  | 0                    | 0                               | 2       | 96                   | 0                             | 1  | 0                             |
| 1130 <sub>β</sub> | β-LUSO+3 | -3.47 | 0                    | 0  | 0                    | 0                               | 4       | 96                   | 0                             | 0  | 0                             |
| 289 <sub>α</sub>  | α-LUSO+2 | -3.47 | 0                    | 0  | 0                    | 0                               | 4       | 96                   | 0                             | 0  | 0                             |
| 1129 <sub>β</sub> | β-LUSO+2 | -3.62 | 0                    | 1  | 0                    | 0                               | 3       | 95                   | 0                             | 1  | 0                             |
| 288 <sub>α</sub>  | α-LUSO+1 | -3.62 | 0                    | 1  | 0                    | 0                               | 3       | 95                   | 0                             | 1  | 0                             |
| 1128 <sub>β</sub> | β-LUSO+1 | -4.19 | 0                    | 15 | 1                    | 2                               | 58      | 4                    | 7                             | 9  | 4                             |
| 287 <sub>α</sub>  | α-LUSO   | -4.22 | 0                    | 12 | 2                    | 2                               | 60      | 4                    | 7                             | 9  | 4                             |
| 1127 <sub>β</sub> | β-LUSO   | -5.34 | 5                    | 68 | 1                    | 17                              | 9       | 0                    | 0                             | 0  | 0                             |
| 286 <sub>α</sub>  | α-HOSO   | -7.42 | 0                    | 3  | 0                    | 1                               | 2       | 0                    | 7                             | 81 | 6                             |
| 1126 <sub>β</sub> | β-HOSO   | -7.43 | 0                    | 6  | 0                    | 2                               | 2       | 0                    | 6                             | 78 | 6                             |
| 285 <sub>α</sub>  | α-HOSO-1 | -7.49 | 0                    | 0  | 0                    | 0                               | 0       | 0                    | 5                             | 88 | 7                             |
| 1125 <sub>β</sub> | β-HOSO-1 | -7.50 | 0                    | 0  | 0                    | 0                               | 0       | 0                    | 5                             | 88 | 7                             |
| 284 <sub>α</sub>  | α-HOSO-2 | -7.98 | 4                    | 50 | 3                    | 29                              | 7       | 0                    | 3                             | 2  | 2                             |
| 1124 <sub>β</sub> | β-HOSO-2 | -7.79 | 4                    | 60 | 4                    | 22                              | 4       | 1                    | 1                             | 2  | 2                             |
| 283 <sub>α</sub>  | α-HOSO-3 | -8.11 | 6                    | 54 | 1                    | 25                              | 11      | 0                    | 1                             | 1  | 1                             |
| 1123 <sub>β</sub> | β-HOSO-3 | -7.95 | 1                    | 38 | 4                    | 10                              | 20      | 2                    | 11                            | 9  | 5                             |

Table S14. Energy and composition of frontier molecular orbitals in the complex **3**

| MO  |      | eV    | NCS1 | (PPh <sub>3</sub> )1 | Os | (PPh <sub>3</sub> )2 | NCS2 | C=C-C=O | (PPh <sub>3</sub> )3 | C <sub>3</sub> H <sub>4</sub> | Fe | C <sub>3</sub> H <sub>5</sub> |
|-----|------|-------|------|----------------------|----|----------------------|------|---------|----------------------|-------------------------------|----|-------------------------------|
| 304 | L+3  | -1.22 | 0    | 0                    | 1  | 0                    | 0    | 2       | 97                   | 0                             | 0  | 0                             |
| 303 | L+2  | -1.43 | 2    | 1                    | 9  | 2                    | 1    | 32      | 46                   | 3                             | 3  | 1                             |
| 302 | L+1  | -1.52 | 0    | 0                    | 1  | 0                    | 0    | 5       | 92                   | 1                             | 1  | 0                             |
| 301 | LUMO | -1.69 | 2    | 0                    | 6  | 2                    | 0    | 22      | 65                   | 1                             | 2  | 0                             |
| 300 | HOMO | -4.13 | 68   | 2                    | 27 | 0                    | 0    | 2       | 0                    | 0                             | 1  | 0                             |
| 299 | H-1  | -4.35 | 70   | 0                    | 13 | 0                    | 7    | 9       | 1                    | 0                             | 0  | 0                             |
| 298 | H-2  | -4.63 | 12   | 1                    | 25 | 2                    | 57   | 1       | 0                    | 1                             | 1  | 0                             |
| 297 | H-3  | -4.84 | 11   | 0                    | 11 | 1                    | 69   | 4       | 0                    | 1                             | 3  | 0                             |

Table S15. Energy and composition of frontier molecular orbitals in the complex **3<sup>+</sup>**

| MO           |                  | eV    | NCS1 | (PPh <sub>3</sub> )1 | Os | (PPh <sub>3</sub> )2 | NCS2 | C=C-C=O | (PPh <sub>3</sub> )3 | C <sub>3</sub> H <sub>4</sub> | Fe | C <sub>3</sub> H <sub>5</sub> |
|--------------|------------------|-------|------|----------------------|----|----------------------|------|---------|----------------------|-------------------------------|----|-------------------------------|
| 304 $\alpha$ | $\alpha$ -LUSO+3 | -3.28 | 0    | 0                    | 1  | 0                    | 0    | 3       | 95                   | 0                             | 1  | 0                             |
| 1170 $\beta$ | $\beta$ -LUSO+3  | -3.60 | 0    | 0                    | 0  | 0                    | 0    | 3       | 97                   | 0                             | 0  | 0                             |
| 303 $\alpha$ | $\alpha$ -LUSO+2 | -3.60 | 0    | 0                    | 0  | 0                    | 0    | 3       | 97                   | 0                             | 0  | 0                             |
| 1169 $\beta$ | $\beta$ -LUSO+2  | -3.66 | 0    | 0                    | 1  | 0                    | 0    | 4       | 94                   | 0                             | 1  | 0                             |
| 302 $\alpha$ | $\alpha$ -LUSO+1 | -3.66 | 0    | 0                    | 1  | 0                    | 0    | 4       | 94                   | 0                             | 1  | 0                             |
| 1168 $\beta$ | $\beta$ -LUSO+1  | -4.43 | 3    | 1                    | 14 | 2                    | 1    | 65      | 2                    | 6                             | 5  | 1                             |
| 301 $\alpha$ | $\alpha$ -LUSO   | -4.44 | 3    | 1                    | 12 | 2                    | 1    | 66      | 2                    | 6                             | 6  | 1                             |
| 1167 $\beta$ | $\beta$ -LUSO    | -5.87 | 33   | 4                    | 53 | 0                    | 4    | 6       | 0                    | 0                             | 0  | 0                             |
| 300 $\alpha$ | $\alpha$ -HOSO   | -7.33 | 0    | 0                    | 10 | 0                    | 54   | 1       | 0                    | 3                             | 29 | 3                             |
| 1166 $\beta$ | $\beta$ -HOSO    | -7.22 | 8    | 0                    | 17 | 1                    | 69   | 2       | 0                    | 0                             | 2  | 1                             |
| 299 $\alpha$ | $\alpha$ -HOSO-1 | -7.34 | 3    | 0                    | 8  | 0                    | 40   | 2       | 0                    | 3                             | 42 | 2                             |
| 1165 $\beta$ | $\beta$ -HOSO-1  | -7.30 | 4    | 0                    | 10 | 0                    | 37   | 4       | 0                    | 4                             | 39 | 2                             |
| 298 $\alpha$ | $\alpha$ -HOSO-2 | -7.41 | 0    | 0                    | 1  | 0                    | 6    | 0       | 0                    | 5                             | 82 | 6                             |
| 1164 $\beta$ | $\beta$ -HOSO-2  | -7.41 | 1    | 0                    | 1  | 0                    | 4    | 0       | 0                    | 6                             | 84 | 4                             |
| 297 $\alpha$ | $\alpha$ -HOSO-3 | -7.45 | 2    | 0                    | 5  | 0                    | 63   | 4       | 0                    | 1                             | 22 | 3                             |
| 1163 $\beta$ | $\beta$ -HOSO-3  | -7.43 | 0    | 0                    | 3  | 0                    | 35   | 2       | 60                   | 0                             | 0  | 0                             |

Table S16. Energy and composition of frontier molecular orbitals in the complex **4**

| MO  |      | eV    | Cl1 | (PPh <sub>2</sub> -C <sub>2</sub> H <sub>4</sub> )1 | Os | (PPh <sub>2</sub> -C <sub>2</sub> H <sub>4</sub> )2 | Cl2 | C=C-C=O | PPh <sub>3</sub> | C <sub>5</sub> H <sub>4</sub> | Fe | C <sub>5</sub> H <sub>5</sub> |
|-----|------|-------|-----|-----------------------------------------------------|----|-----------------------------------------------------|-----|---------|------------------|-------------------------------|----|-------------------------------|
| 267 | L+3  | -1.03 | 0   | 0                                                   | 3  | 0                                                   | 0   | 7       | 89               | 0                             | 1  | 0                             |
| 266 | L+2  | -1.12 | 0   | 0                                                   | 8  | 0                                                   | 1   | 28      | 55               | 3                             | 4  | 1                             |
| 265 | L+1  | -1.31 | 0   | 0                                                   | 6  | 0                                                   | 1   | 20      | 68               | 2                             | 2  | 1                             |
| 264 | LUMO | -1.39 | 0   | 0                                                   | 0  | 0                                                   | 0   | 0       | 100              | 0                             | 0  | 0                             |
| 263 | HOMO | -4.23 | 20  | 6                                                   | 66 | 0                                                   | 0   | 8       | 0                | 0                             | 0  | 0                             |
| 262 | H-1  | -4.46 | 8   | 2                                                   | 60 | 5                                                   | 13  | 11      | 1                | 0                             | 0  | 0                             |
| 261 | H-2  | -4.80 | 8   | 1                                                   | 38 | 2                                                   | 14  | 12      | 0                | 3                             | 19 | 3                             |
| 260 | H-3  | -5.02 | 0   | 0                                                   | 0  | 0                                                   | 0   | 0       | 0                | 6                             | 88 | 6                             |

Table S17. Energy and composition of frontier molecular orbitals in the complex **4<sup>+</sup>**

| MO           |                  | eV    | Cl1 | (PPh <sub>3</sub> -C <sub>2</sub> H <sub>4</sub> )1 | Os | (PPh <sub>3</sub> -C <sub>2</sub> H <sub>4</sub> )2 | Cl2 | C=C-C=O | PPh <sub>3</sub> | C <sub>5</sub> H <sub>4</sub> | Fe | C <sub>5</sub> H <sub>5</sub> |
|--------------|------------------|-------|-----|-----------------------------------------------------|----|-----------------------------------------------------|-----|---------|------------------|-------------------------------|----|-------------------------------|
| 267 $\alpha$ | $\alpha$ -LUSO+3 | -3.29 | 0   | 0                                                   | 1  | 0                                                   | 0   | 2       | 97               | 0                             | 0  | 0                             |
| 1021 $\beta$ | $\beta$ -LUSO+3  | -3.53 | 0   | 0                                                   | 0  | 0                                                   | 0   | 4       | 96               | 0                             | 0  | 0                             |
| 266 $\alpha$ | $\alpha$ -LUSO+2 | -3.54 | 0   | 0                                                   | 0  | 0                                                   | 0   | 4       | 96               | 0                             | 0  | 0                             |
| 1020 $\beta$ | $\beta$ -LUSO+2  | -3.65 | 0   | 0                                                   | 0  | 0                                                   | 0   | 1       | 99               | 0                             | 0  | 0                             |
| 265 $\alpha$ | $\alpha$ -LUSO+1 | -3.65 | 0   | 0                                                   | 0  | 0                                                   | 0   | 2       | 98               | 0                             | 0  | 0                             |
| 1019 $\beta$ | $\beta$ -LUSO+1  | -4.30 | 1   | 0                                                   | 15 | 1                                                   | 2   | 63      | 0                | 6                             | 7  | 5                             |
| 264 $\alpha$ | $\alpha$ -LUSO   | -4.32 | 1   | 0                                                   | 12 | 1                                                   | 2   | 66      | 0                | 6                             | 8  | 4                             |
| 1018 $\beta$ | $\beta$ -LUSO    | -5.68 | 13  | 5                                                   | 74 | 0                                                   | 0   | 8       | 0                | 0                             | 0  | 0                             |
| 263 $\alpha$ | $\alpha$ -HOSO   | -7.45 | 0   | 0                                                   | 2  | 0                                                   | 0   | 2       | 0                | 7                             | 83 | 6                             |
| 1017 $\beta$ | $\beta$ -HOSO    | -7.46 | 0   | 0                                                   | 4  | 0                                                   | 1   | 2       | 0                | 7                             | 82 | 4                             |
| 262 $\alpha$ | $\alpha$ -HOSO-1 | -7.51 | 0   | 0                                                   | 0  | 0                                                   | 0   | 0       | 0                | 6                             | 88 | 6                             |
| 1016 $\beta$ | $\beta$ -HOSO-1  | -7.51 | 0   | 0                                                   | 0  | 0                                                   | 0   | 0       | 0                | 6                             | 88 | 6                             |
| 261 $\alpha$ | $\alpha$ -HOSO-2 | -8.01 | 10  | 3                                                   | 47 | 3                                                   | 29  | 7       | 0                | 0                             | 1  | 0                             |
| 1015 $\beta$ | $\beta$ -HOSO-2  | -7.78 | 11  | 2                                                   | 54 | 3                                                   | 21  | 8       | 0                | 0                             | 1  | 0                             |
| 260 $\alpha$ | $\alpha$ -HOSO-3 | -8.15 | 8   | 5                                                   | 31 | 1                                                   | 31  | 6       | 1                | 8                             | 2  | 7                             |
| 1014 $\beta$ | $\beta$ -HOSO-3  | -7.98 | 7   | 3                                                   | 36 | 2                                                   | 25  | 8       | 0                | 8                             | 5  | 6                             |

Table S18. Major electronic excitations for compounds [1] and [1]<sup>+</sup>, as determined by using TDDFT methods (B3LYP/6-31G\*)

| Compound         | $\lambda$ [nm] | $f$   | Major contributions ([%])           | Assignment                                      |
|------------------|----------------|-------|-------------------------------------|-------------------------------------------------|
| [1]              | 684.8          | 0.002 | HOMO-3→LUMO+15(24)                  | M(Fe)→L(PPh <sub>3</sub> )CT                    |
|                  | 540.3          | 0.005 | HOMO→LUMO(63)                       | M(Os)L(Cl1)→L(PPh <sub>3</sub> <sup>+</sup> )CT |
|                  |                |       | HOMO→LUMO+2(27)                     | M(Os)L(Cl1)→LCT                                 |
|                  | 538.2          | 0.002 | HOMO-3→LUMO+13(13)                  | M(Fe)→LCT                                       |
|                  | 459.8          | 0.014 | HOMO-2→LUMO(79)                     | M(Os)→L(PPh <sub>3</sub> <sup>+</sup> )CT       |
| [1] <sup>+</sup> | 704.76         | 0.009 | $\alpha$ -HOSO→ $\alpha$ -LUSO(16)  | M(Fe)→L(C=C-C=O)CT                              |
|                  |                |       | $\beta$ -HOSO→ $\beta$ -LUSO+1 (14) | M(Fe)→L(C=C-C=O)CT                              |

Table S19. Major electronic excitations for compounds [2] and [2]<sup>+</sup>.

| Compound         | $\lambda$ [nm] | $f$   | Major contributions ([%])           | Assignment                                                              |
|------------------|----------------|-------|-------------------------------------|-------------------------------------------------------------------------|
| [2]              | 698.9          | 0.004 | HOMO-3→LUMO+15(19)                  | M(Fe)→LCT                                                               |
|                  | 549.7          | 0.006 | HOMO-3→LUMO+15(14)                  | M(Fe)→LCT                                                               |
|                  |                |       | HOMO-1→LUMO(15)                     | M(Os)L( $\eta^2$ -CO <sub>3</sub> )→L(PPh <sub>3</sub> <sup>+</sup> )CT |
|                  |                |       | HOMO-1→LUMO+2(16)                   | M(Os)L( $\eta^2$ -CO <sub>3</sub> )→L(PPh <sub>3</sub> <sup>+</sup> )CT |
|                  | 544.6          | 0.005 | HOMO→LUMO(62)                       | M(Os)L( $\eta^2$ -CO <sub>3</sub> )→L(PPh <sub>3</sub> <sup>+</sup> )CT |
|                  | 454.7          | 0.016 | HOMO-2→LUMO(94)                     | M(Os)→L(PPh <sub>3</sub> <sup>+</sup> )CT                               |
| [2] <sup>+</sup> | 719.4          | 0.010 | $\alpha$ -HOSO→ $\alpha$ -LUSO (17) | M(Fe)→L(C=C-C=O)CT                                                      |
|                  |                |       | $\beta$ -HOSO→ $\beta$ -LUSO+1 (15) | M(Fe)→L(C=C-C=O)CT                                                      |

Table S20. Major electronic excitations for compounds [3] and [3]<sup>+</sup>.

| Compound         | $\lambda$ [nm] | $f$   | Major contributions ([%])           | Assignment                                       |
|------------------|----------------|-------|-------------------------------------|--------------------------------------------------|
| [3]              | 691.7          | 0.002 | HOMO-5→LUMO+16(25)                  | M(Fe)→LCT                                        |
|                  | 588.5          | 0.007 | HOMO-2→LUMO(26)                     | M(Os)L(NCS2)→L(PPh <sub>3</sub> <sup>+</sup> )CT |
|                  |                |       | HOMO-1→LUMO(45)                     | M(Os)L(NCS1)→L(PPh <sub>3</sub> <sup>+</sup> )CT |
|                  | 546.3          | 0.009 | HOMO-4→LUMO+16(19)                  | M(Fe)→LCT                                        |
|                  | 531.4          | 0.012 | HOMO-2→LUMO(21)                     | M(Os)L(NCS2)→L(PPh <sub>3</sub> <sup>+</sup> )CT |
|                  |                |       | HOMO-1→LUMO(40)                     | M(Os)L(NCS1)→L(PPh <sub>3</sub> <sup>+</sup> )CT |
|                  | 504.1          | 0.018 | HOMO-1→LUMO+1(68)                   | M(Os)L(NCS1)→L(PPh <sub>3</sub> <sup>+</sup> )CT |
|                  | 494.8          | 0.027 | HOMO-1→LUMO+1(21)                   | M(Os)L(NCS1)→L(PPh <sub>3</sub> <sup>+</sup> )CT |
|                  |                |       | HOMO-1→LUMO+2(62)                   | M(Os)L(NCS1)→LCT                                 |
| [3] <sup>+</sup> | 822.0          | 0.004 | $\beta$ -HOSO-9→ $\beta$ -LUSO (41) | L→M(Os)L(NCS1)CT                                 |
|                  |                |       | $\beta$ -HOSO-6→ $\beta$ -LUSO (22) | L→M(Os)L(NCS1)CT                                 |
|                  | 731.1          | 0.022 | $\alpha$ -HOSO→ $\alpha$ -LUSO (14) | L(NCS2)→L(C=C-C=O)CT                             |
|                  |                |       |                                     | M(Fe)→L(C=C-C=O)CT                               |
|                  |                |       | $\beta$ -HOSO-5→ $\beta$ -LUSO(18)  | L(NCS1)→M(Os)CT                                  |

Table S21. Major electronic excitations for compounds [4] and [4]<sup>+</sup>.

| Compound         | $\lambda$ [nm] | $f$   | Major contributions ([%])           | Assignment                   |
|------------------|----------------|-------|-------------------------------------|------------------------------|
| [4]              | 680.4          | 0.002 | HOMO-3→LUMO+12(36)                  | M(Fe)→LCT                    |
|                  | 536.5          | 0.002 | HOMO-3→LUMO+12(29)                  | M(Fe)→LCT                    |
|                  | 481.9          | 0.005 | HOMO-1→LUMO(98)                     | M(Os)→L(PPh <sub>3</sub> )CT |
|                  | 438.1          | 0.007 | HOMO-2→LUMO(88)                     | M(Os)→L(PPh <sub>3</sub> )CT |
| [4] <sup>+</sup> | 705.5          | 0.008 | $\alpha$ -HOSO→ $\alpha$ -LUSO (18) | M(Fe)→L(C=C-C=O)CT           |
|                  |                |       | $\beta$ -HOSO→ $\beta$ -LUSO+1 (16) | M(Fe)→L(C=C-C=O)CT           |

## 4. NMR data

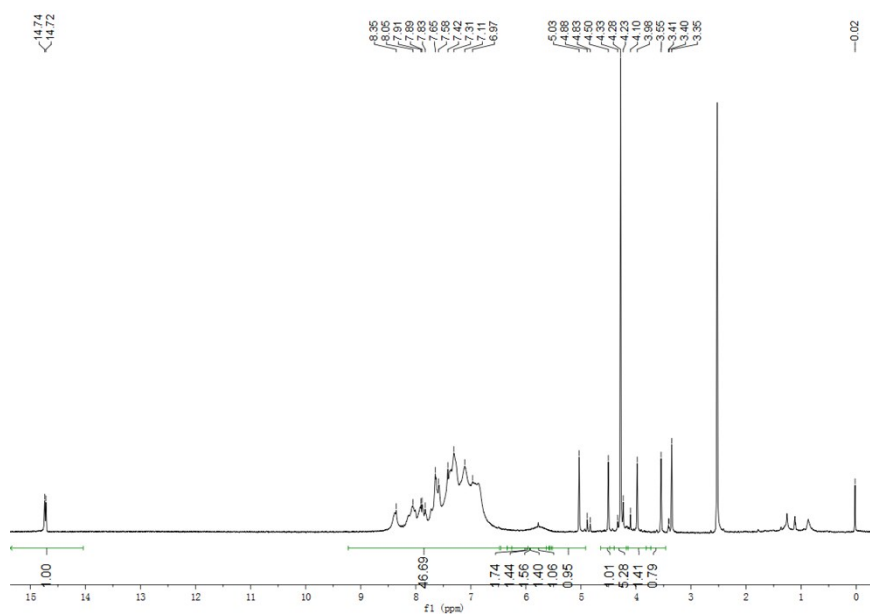

(a)

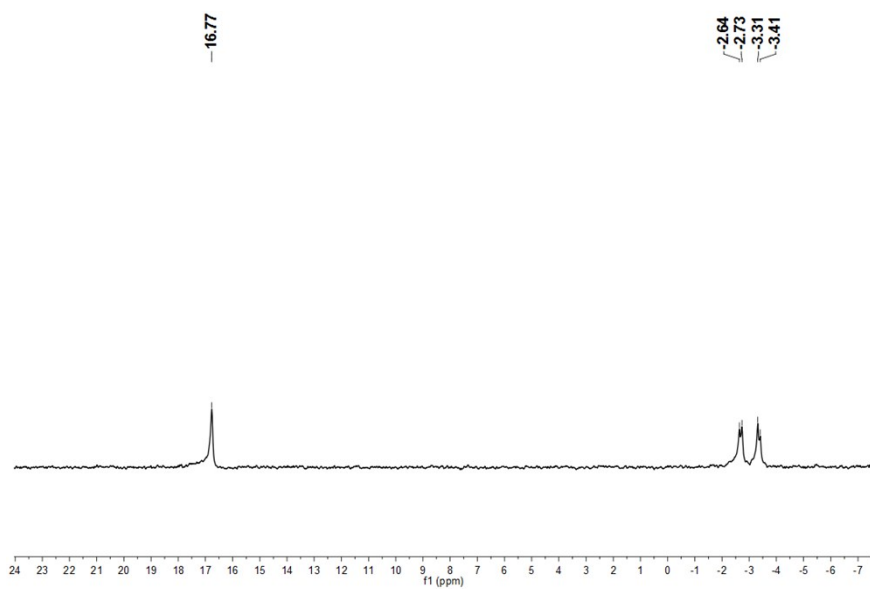

(b)

Figure S1  $^1\text{H}$  NMR (D6-DMSO, 500 MHz) (a) and  $^{31}\text{P}\{^1\text{H}\}$  NMR (D6-DMSO, 202.47 MHz) (b) for complex **1**.

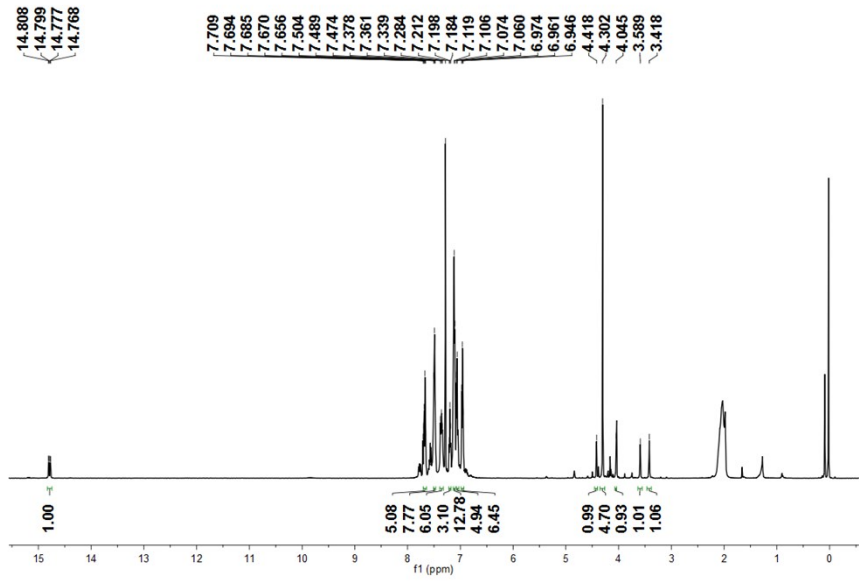

(a)

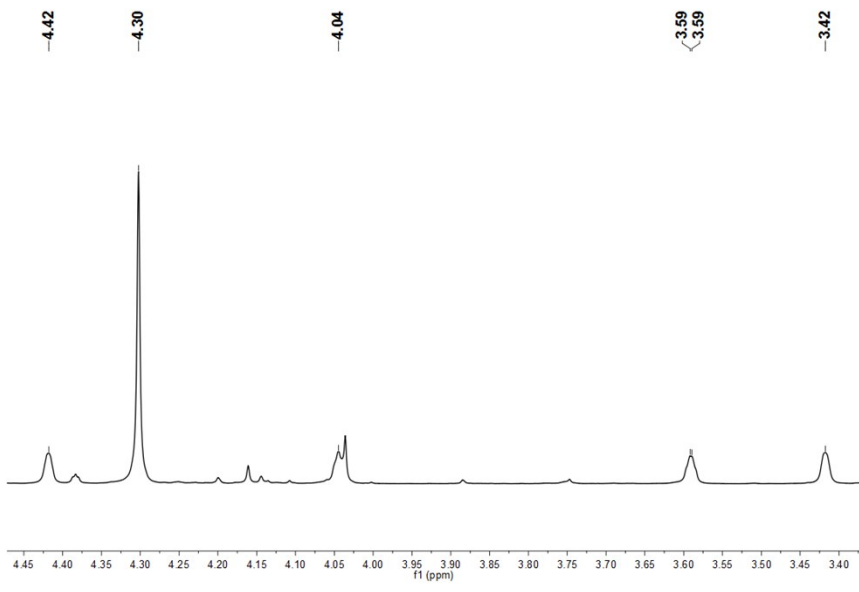

(b)



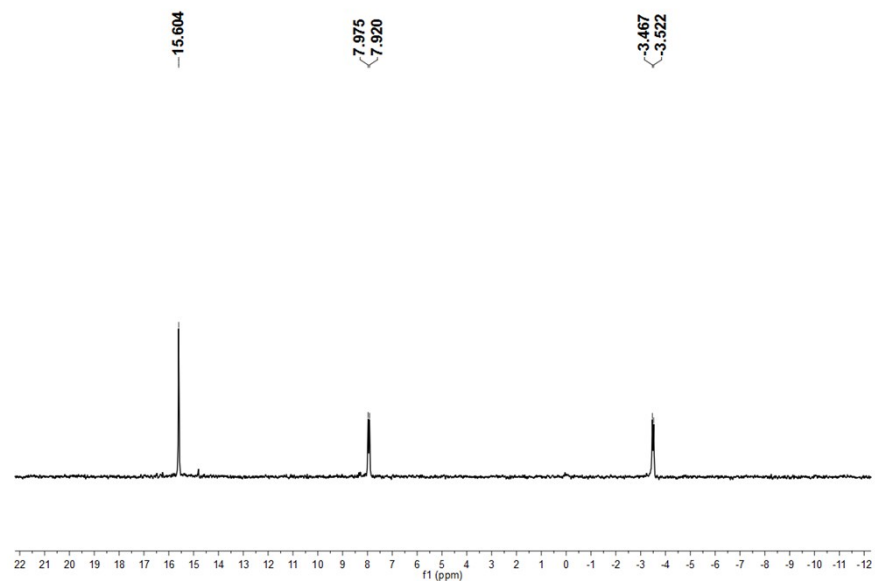

(c)

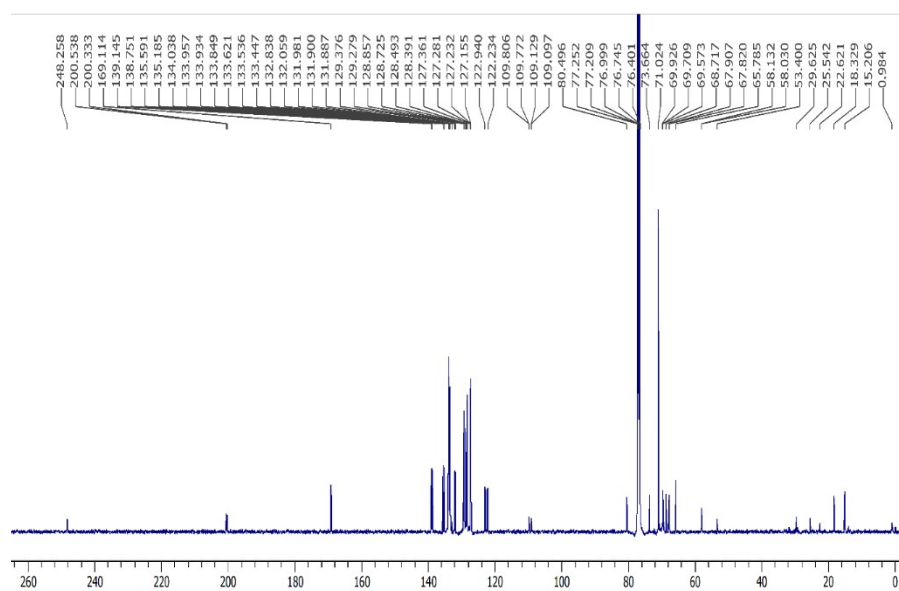

(d)

Figure S2  $^1\text{H}$  NMR ( $\text{CDCl}_3$ , 500 MHz) (a, b),  $^{31}\text{P}\{^1\text{H}\}$  NMR ( $\text{CDCl}_3$ , 202.47 MHz) (c), and  $^{13}\text{C}\{^1\text{H}\}$  NMR ( $\text{CDCl}_3$ , 125.77 MHz) (d) of complex **2**.

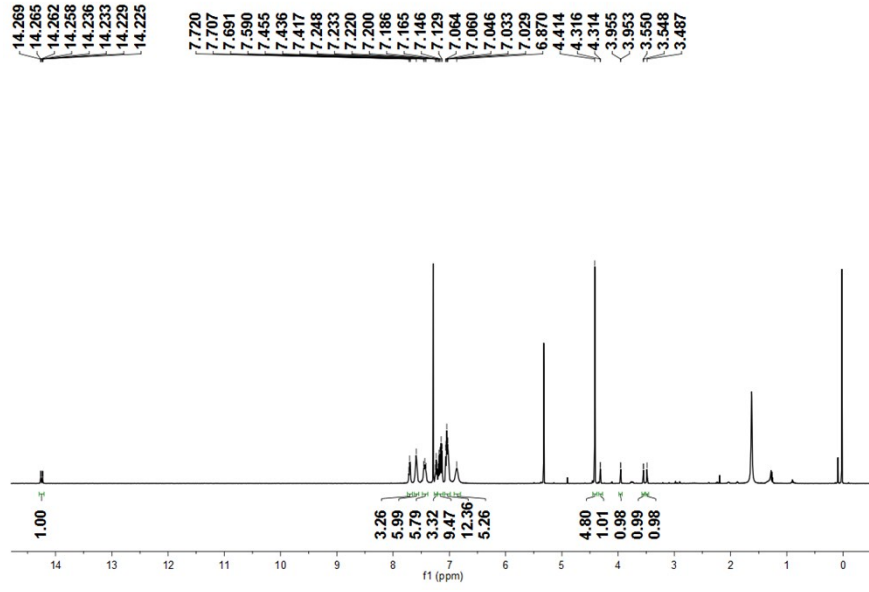

(a)

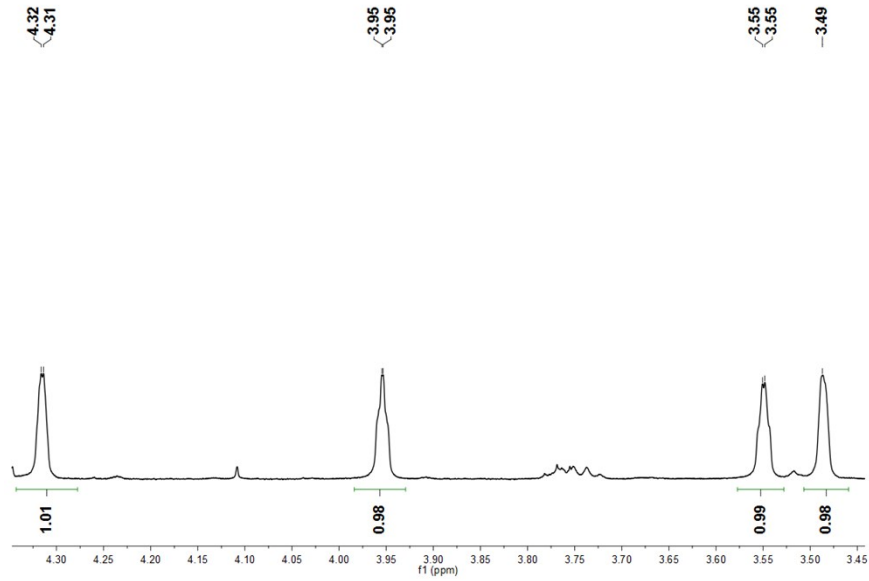

(b)

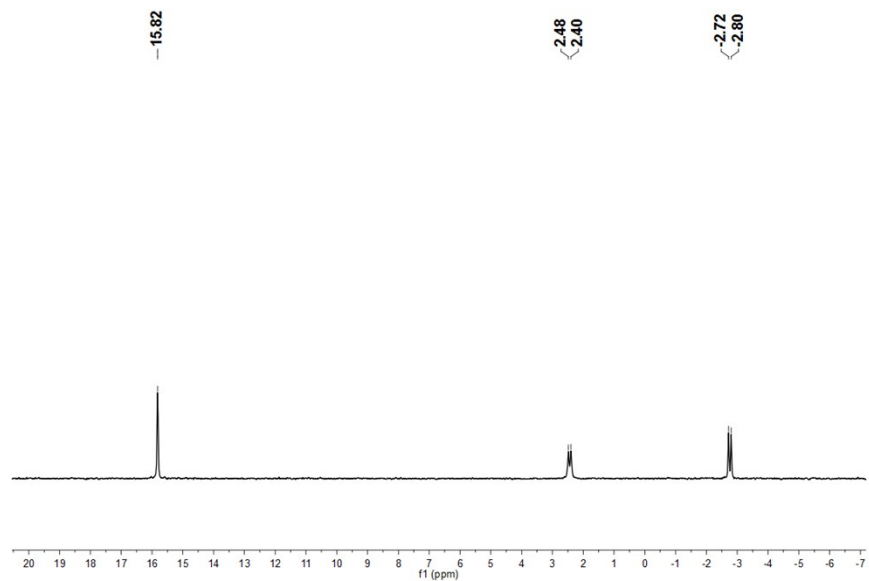

(c)

**Figure S3**  $^1\text{H}$  NMR ( $\text{CDCl}_3$ , 500 MHz) (**a** and **b**) and  $^{31}\text{P}\{^1\text{H}\}$  NMR ( $\text{CDCl}_3$ , 202.47 MHz) (**c**) of complex **3**.

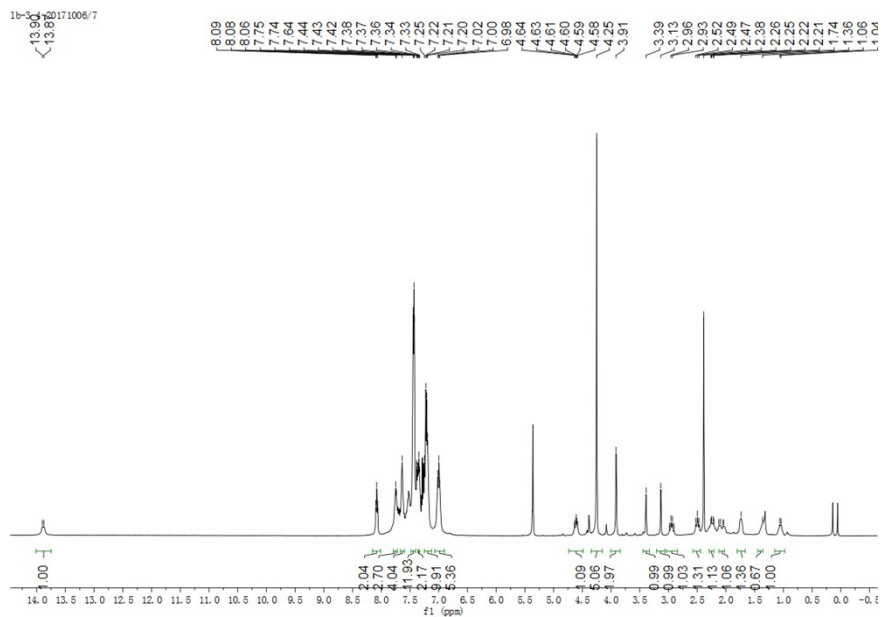

(a)  $^1\text{H}$  NMR ( $\text{CD}_2\text{Cl}_2$ , 500 MHz).

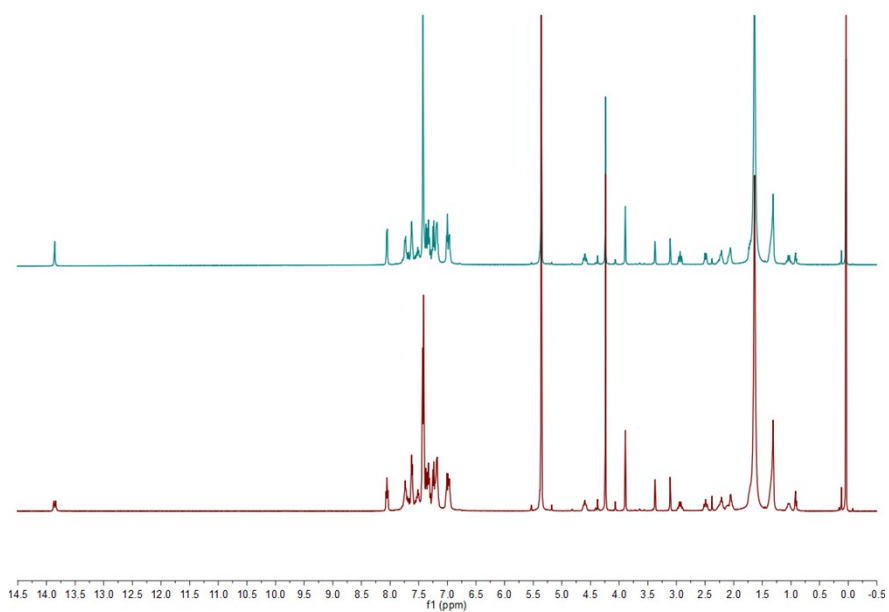

(b)  $^1\text{H}$ ( $\text{CD}_2\text{Cl}_2$ , 500 MHz) NMR (up) and  $^1\text{H}\{^{31}\text{P}\}$  NMR (down).

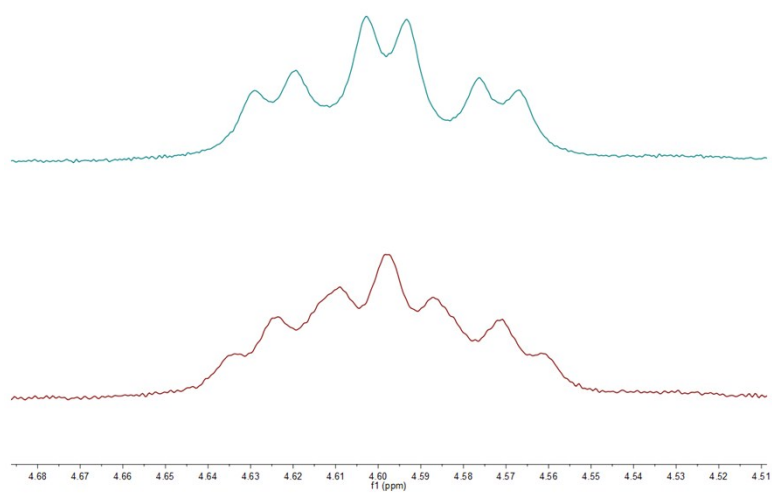

(c)  $^1\text{H}(\text{CD}_2\text{Cl}_2, 500 \text{ MHz})$  NMR (up) and  $^1\text{H}\{^{31}\text{P}\}$  NMR (down) of the peak at 4.60 ppm.

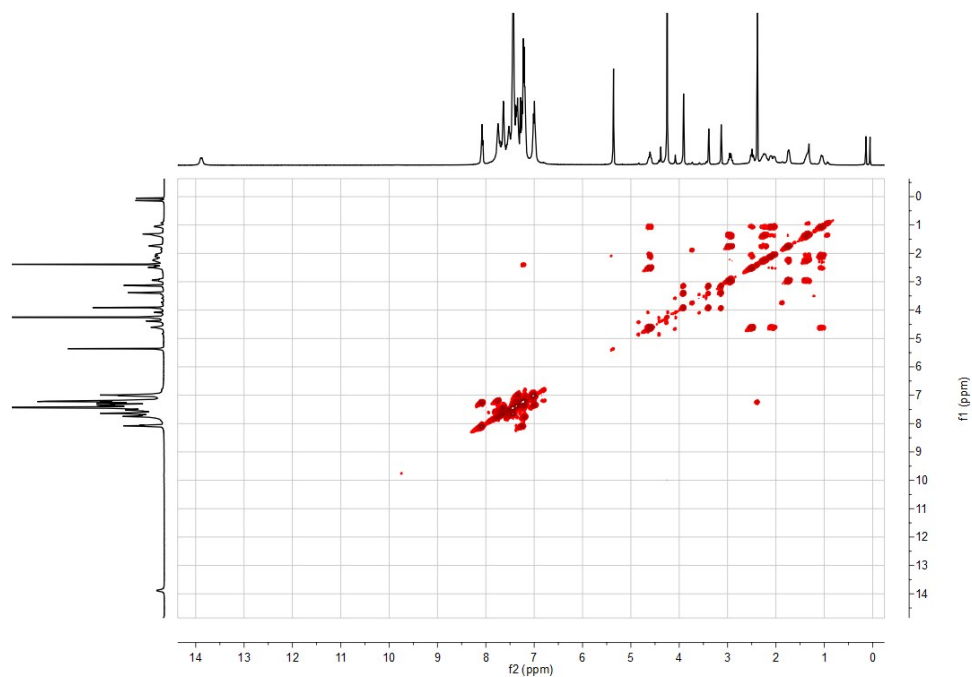

(d) H-H COSY

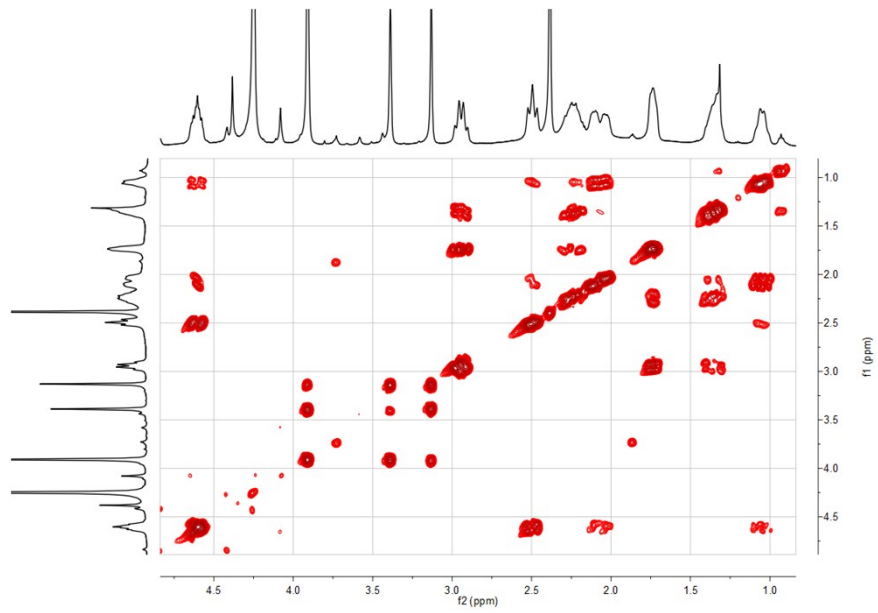

(e) H-H COSY (1.0 ppm-4.7 ppm)

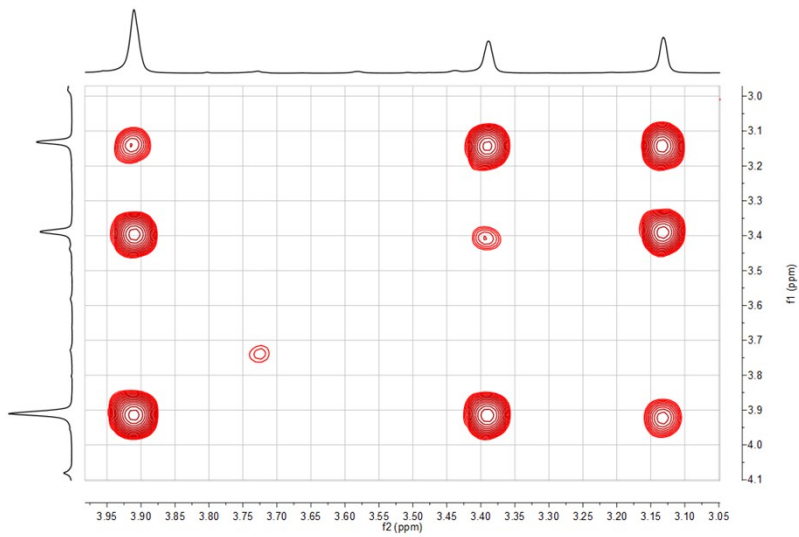

(f) H-H COSY (3.0 ppm-4.1 ppm)

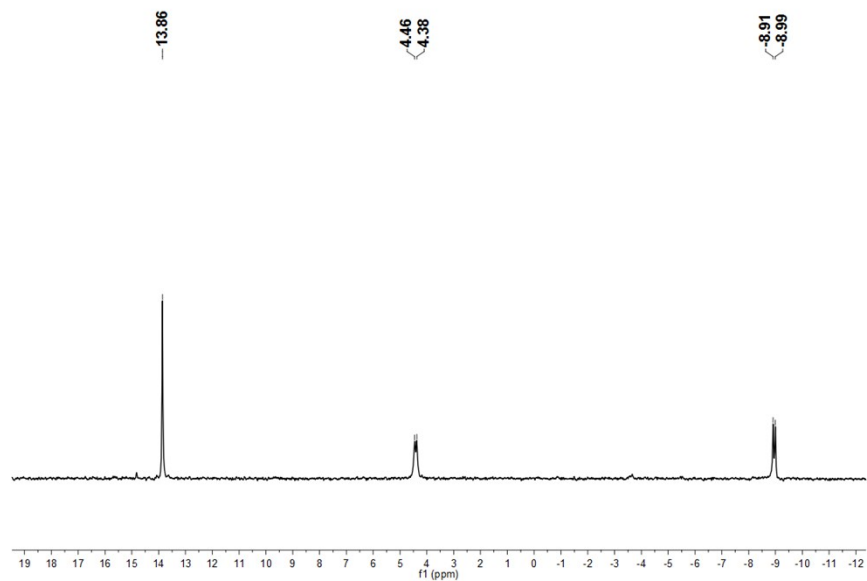

(g)  $^{31}\text{P}\{^1\text{H}\}$  ( $\text{CD}_2\text{Cl}_2$ , 125 MHz)

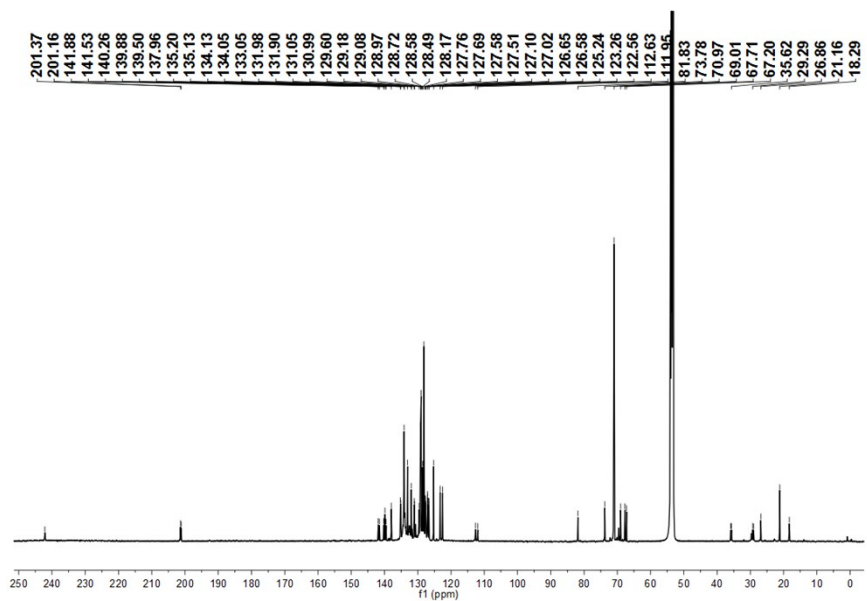

(h)  $^{13}\text{C}\{^1\text{H}\}$  NMR ( $\text{CD}_2\text{Cl}_2$ , 125 MHz)

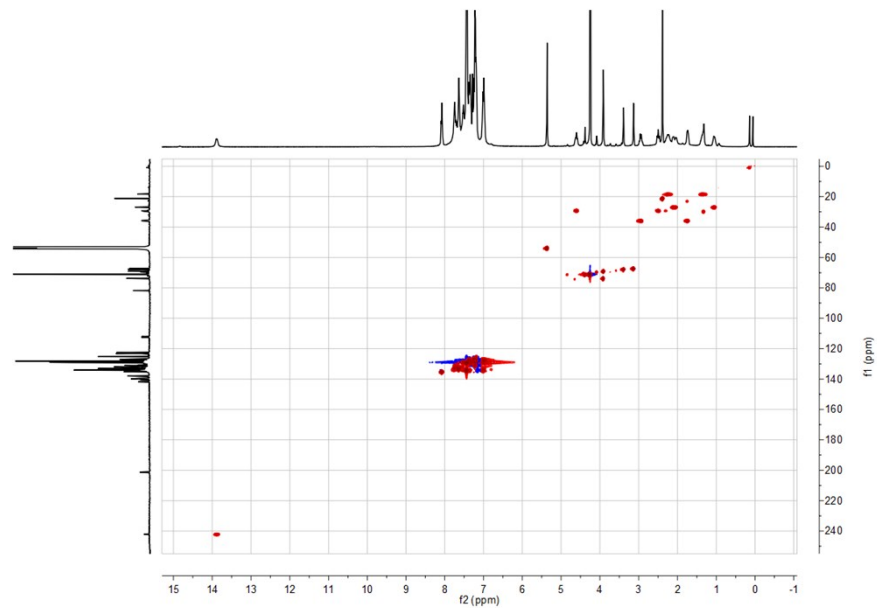

(i) C-H COSY

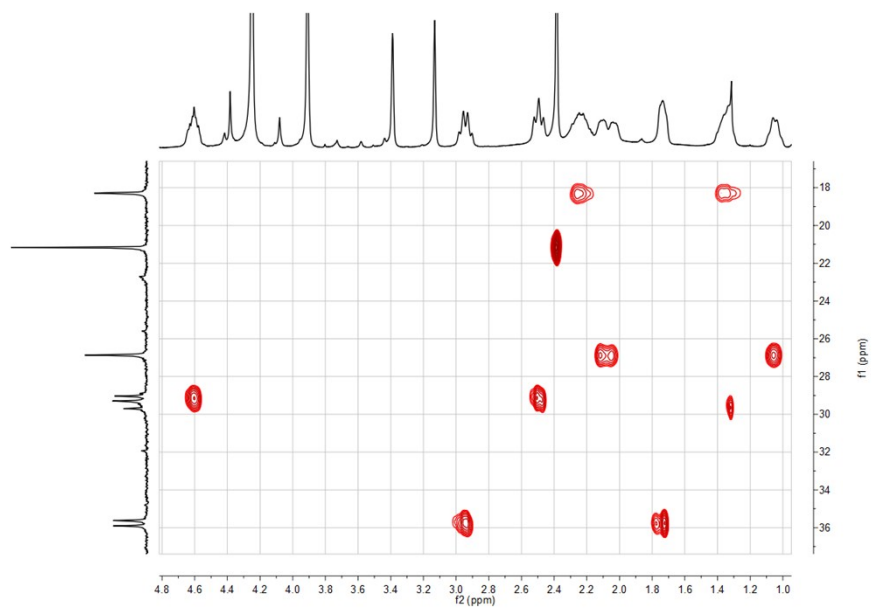

(j) C-H COSY ( $^{13}\text{C}\{^1\text{H}\}$ : 18-36 ppm,  $^1\text{H}$ : 1.0-4.8 ppm)



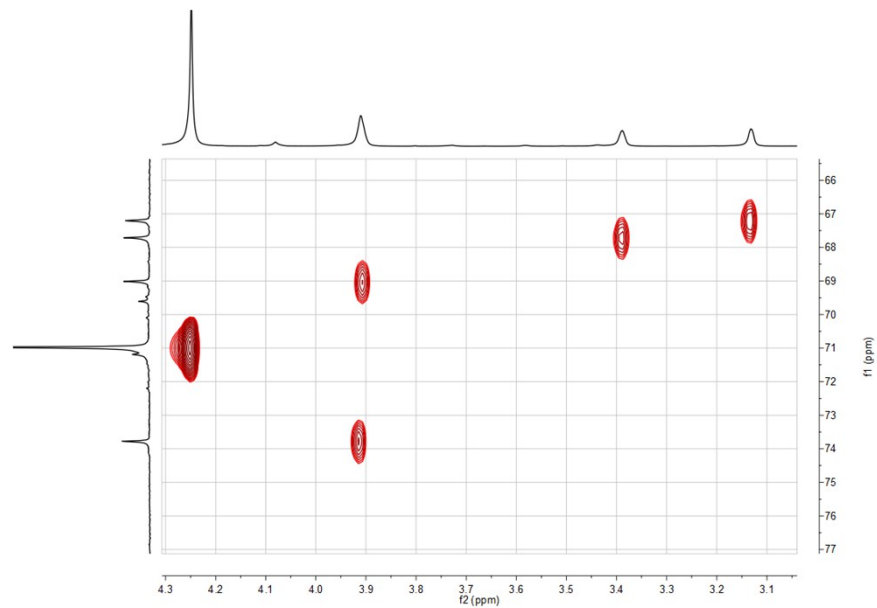

**(k)** C-H COSY ( $^{13}\text{C}\{^1\text{H}\}$ : 66-77 ppm,  $^1\text{H}$ : 3.1-4.3 ppm)

Figure S4 NMR spectra of complex **4** (**a-k**)
